# Supplementary material for: Inter- vs. Intramolecular Hydrogen Bond Patterns and Proton Dynamics in Nitrophthalic Acid Associates
Source: PubMed Central journal article supplement (PMC7587347; doi:10.3390/molecules25204720), 2020-10-14
Supplement: molecules-25-04720-s001.pdf [file molecules-25-04720-s001.pdf]

## Supporting Information for Publication

# Inter- vs. Intramolecular Hydrogen Bond Patterns and Proton Dynamics in Nitrophthalic Acid Associates

Kinga Józwiak <sup>1</sup>, Aneta Jezierska <sup>1</sup>, Jarosław J. Panek <sup>1</sup>, Eugene A. Goremychkin <sup>2</sup>, Peter M. Tolstoy <sup>3</sup>, Ilya G. Shenderovich <sup>4,\*</sup> and Aleksander Filarowski <sup>1,\*</sup>

<sup>1</sup> Faculty of Chemistry, University of Wrocław 14 F. Joliot-Curie str., 50-383 Wrocław, Poland; [kin.joz@o2.pl](mailto:kin.joz@o2.pl), [aneta.jezierska@chem.uni.wroc.pl](mailto:aneta.jezierska@chem.uni.wroc.pl), [jaroslaw.panek@chem.uni.wroc.pl](mailto:jaroslaw.panek@chem.uni.wroc.pl), [aleksander.filarowski@chem.uni.wroc.pl](mailto:aleksander.filarowski@chem.uni.wroc.pl)

<sup>2</sup> Frank Laboratory of Neutron Physics, Joint Institute for Nuclear Research 6 F. Joliot-Curie str., 141980 Dubna, Russia; [goremychkin@jinr.ru](mailto:goremychkin@jinr.ru)

<sup>3</sup> Institute of Chemistry, St. Petersburg State University, Universitetskij pr. 26, 198504 St. Petersburg, Russia; [peter.tolstoy@spbu.ru](mailto:peter.tolstoy@spbu.ru)

<sup>4</sup> Institute of Organic Chemistry, University of Regensburg, Universitaetstrasse 31, 93053 Regensburg, Germany; [Ilya.Shenderovich@chemie.uni-regensburg.de](mailto:Ilya.Shenderovich@chemie.uni-regensburg.de)

\* Correspondence: [aleksander.filarowski@chem.uni.wroc.pl](mailto:aleksander.filarowski@chem.uni.wroc.pl); Tel.: +48-71-375-7229 (A.F.)  
[Ilya.Shenderovich@chemie.uni-regensburg.de](mailto:Ilya.Shenderovich@chemie.uni-regensburg.de) (I.G.S.)

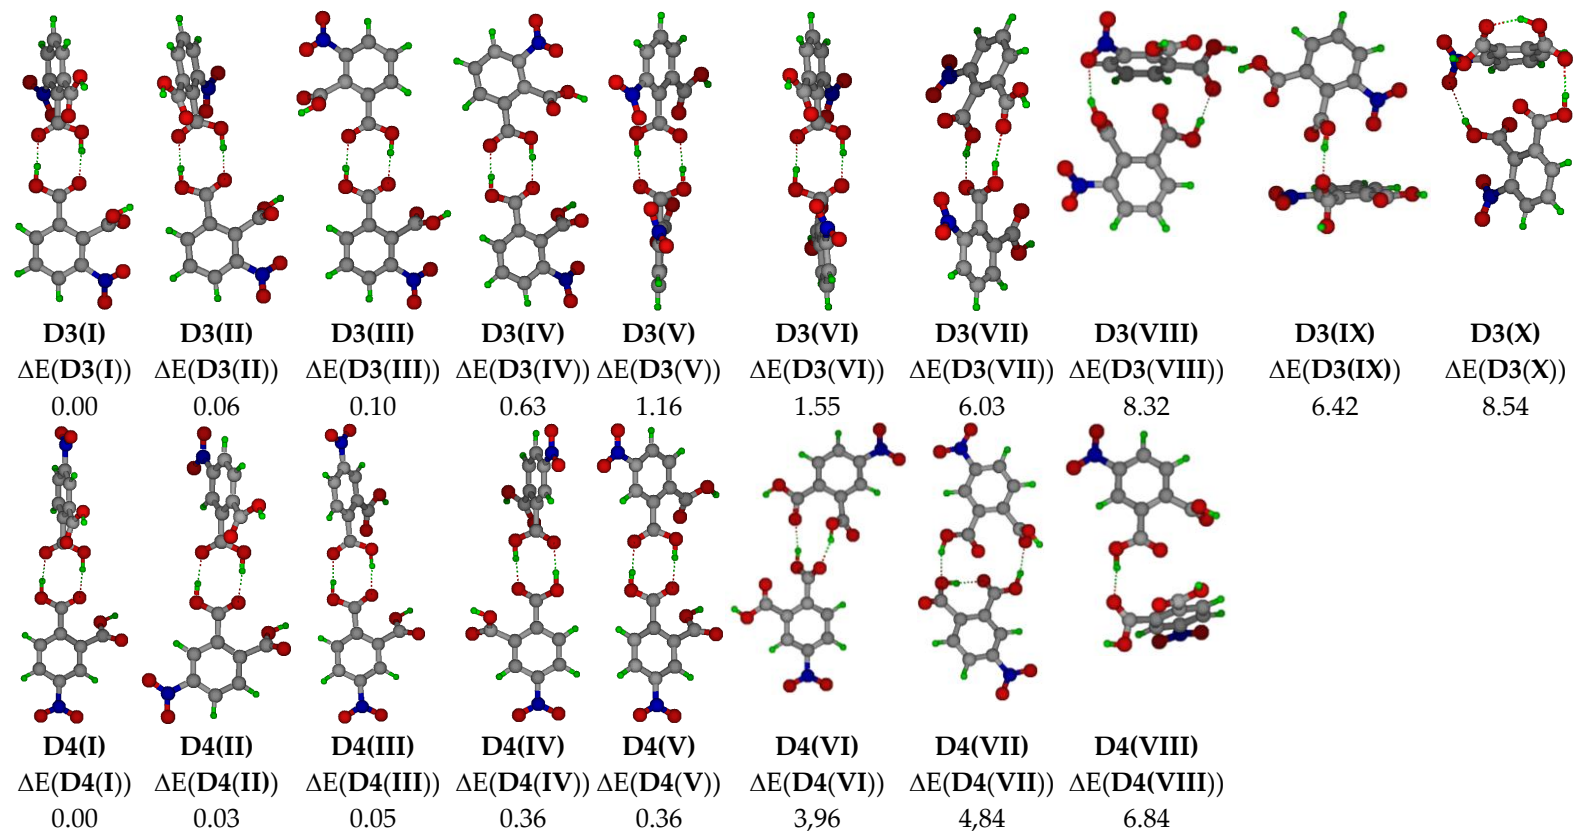

**Figure S1.** The dimeric forms of compounds 3 and 4 and relative energy values (in kcal/mol) obtained at B3LYP/6-311+G(d,p) level of theory.

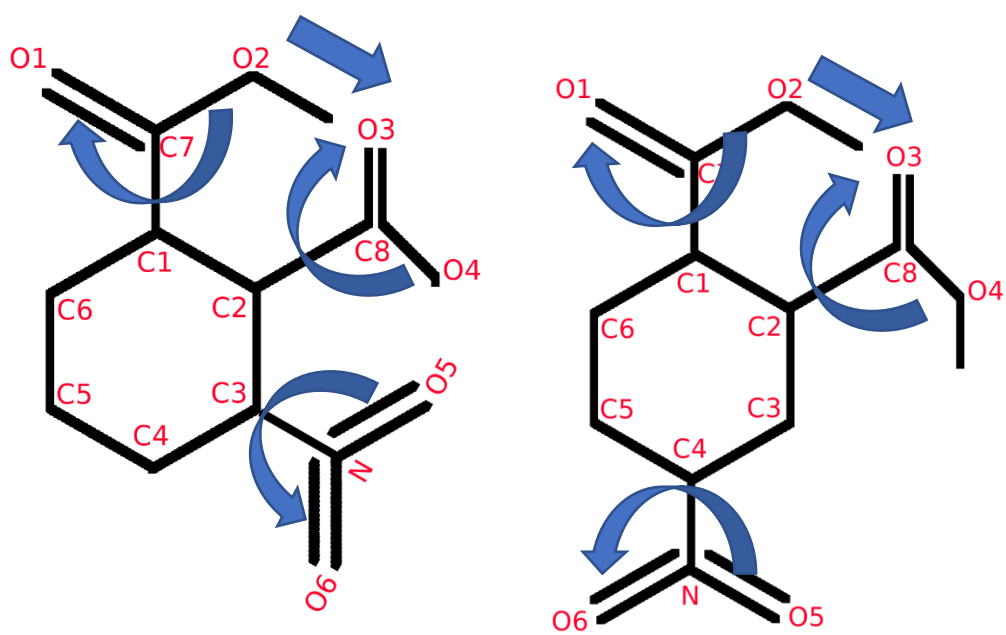

Figure S2. Structures and atoms numbering of studied compounds 3 and 4.

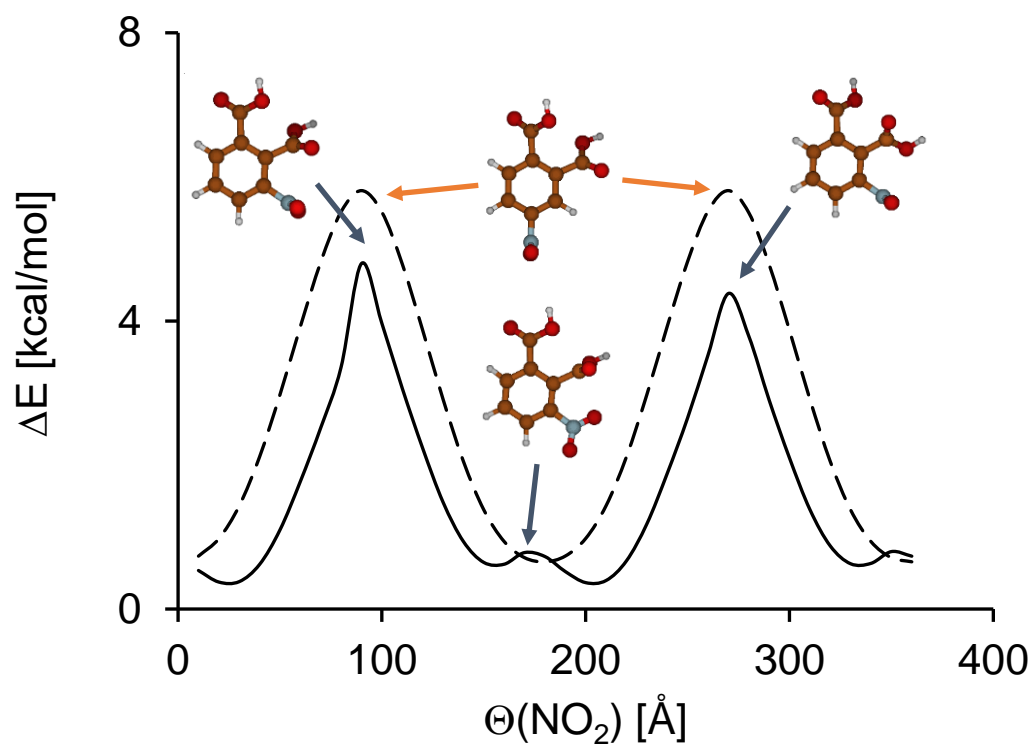

**Figure S3.** Calculated potential energy curves for the gradual nitro group rotation of conformers **3(I)** (solid line) and **4(II)** (dashed line).

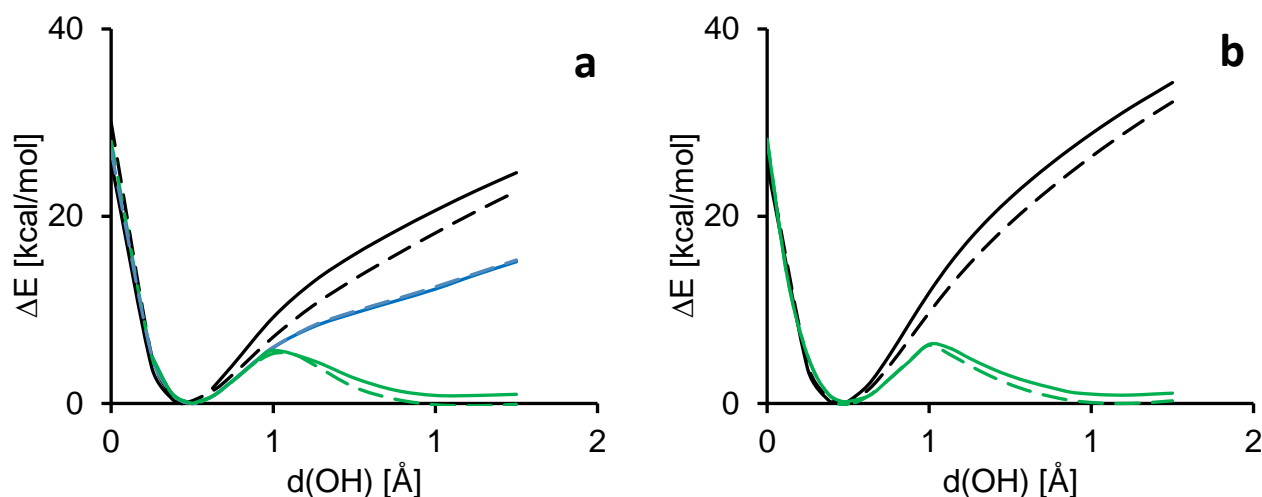

**Figure S4.** Calculated (B3LYP/6-311+G(d,p), PCM approach for acetonitrile (a) and gas phase (b)) potential energy functions by the gradual displacement of one proton for compounds **3** (solid lines) and **4** (dashed lines) whereas the remaining parameters were optimized: in the intramolecular hydrogen bond of monomers (black lines), in the intermolecular hydrogen bond of dimers (green lines) and in the intermolecular hydrogen bond of dimers for fixed adjacent bridged proton (blue lines).

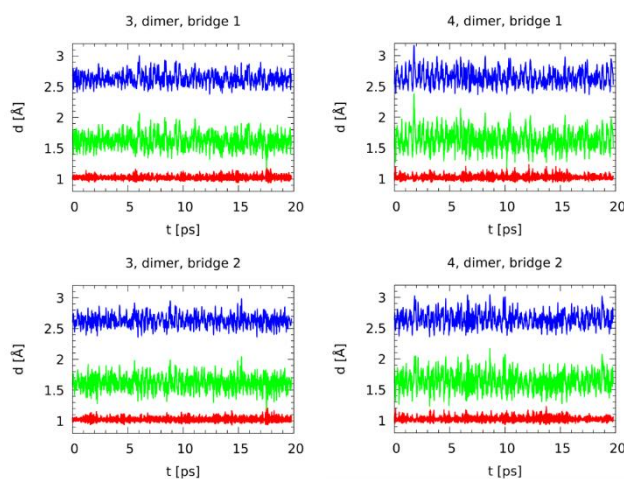

**Figure S5.** Time evolution of the metric parameters of two symmetric hydrogen bridges. The CPMD gas phase simulations of the dimers of **3** and **4**. Red: donor-proton distance, green: proton-acceptor distance, blue: donor-acceptor distance.

**Table S1.** <sup>1</sup>H NMR data for compound **3** in CDCl<sub>3</sub> in the presence of N,N-diethylethanamine (Et<sub>3</sub>N).

| Mean chemical shift of mobile protons/ ppm | Et <sub>3</sub> N mole fraction | Water mole fraction | compound <b>3</b> mole fraction | Estimated mean chemical shift of the mobile protons of compound <b>3</b> / ppm |
|--------------------------------------------|---------------------------------|---------------------|---------------------------------|--------------------------------------------------------------------------------|
| 3.3                                        | 35                              | 1                   | 0                               | -                                                                              |
| 13.0                                       | 35                              | 1                   | 8.7                             | 14.1                                                                           |
| 13.4                                       | 35                              | 1                   | 15.1                            | 14.1                                                                           |
| 13.4                                       | 70                              | 1                   | 15.1                            | 14.1                                                                           |

**Table S2.** <sup>1</sup>H NMR data for compound **4** in CDCl<sub>3</sub> in the presence of N,N-diethylethanamine (Et<sub>3</sub>N).

| Mean chemical shift of mobile protons/ ppm | Et <sub>3</sub> N mole fraction | Water mole fraction | compound <b>4</b> mole fraction | Estimated mean chemical shift of the mobile protons of compound <b>4</b> / ppm |
|--------------------------------------------|---------------------------------|---------------------|---------------------------------|--------------------------------------------------------------------------------|
| 3.3                                        | 35                              | 1                   | 0                               | -                                                                              |
| 8.9                                        | 35                              | 1                   | 1.2                             | 13.6                                                                           |
| 11.9                                       | 35                              | 1                   | 4.0                             | 14.1                                                                           |
| 13.0                                       | 35                              | 1                   | 8.7                             | 14.1                                                                           |
| 13.3                                       | 35                              | 1                   | 13.2                            | 14.1                                                                           |
| 13.1                                       | 70                              | 1                   | 13.2                            | 13.8                                                                           |

**Table S3.** <sup>1</sup>H NMR data for compound **4** in CDCl<sub>3</sub> in the presence of N,N-dimethylpyridin-4-amine (DMAP).

| Mean chemical shift of mobile protons/ ppm | DMAP mole fraction | Water mole fraction | compound <b>4</b> mole fraction | Estimated mean chemical shift of the mobile protons of compound <b>4</b> / ppm |
|--------------------------------------------|--------------------|---------------------|---------------------------------|--------------------------------------------------------------------------------|
| 4.58                                       | 260                | 1                   | 0                               | -                                                                              |
| 11.38                                      | 260                | 1                   | 1.04                            | 17.9                                                                           |
| 13.31                                      | 260                | 1                   | 1.75                            | 18.3                                                                           |
| 14.63                                      | 260                | 1                   | 2.44                            | 18.7                                                                           |
| 15.31                                      | 260                | 1                   | 3.23                            | 18.6                                                                           |
| 15.84                                      | 260                | 1                   | 3.85                            | 18.8                                                                           |

1  
2  
3

**Table S4.** Experimental IR, Raman, IINS and calculated DFT (B3LYP/6-311+G(d,p)) spectral data of compound **3** and its mono deuterated (OH → OD) derivative.

| Nº | IR(OH),<br>cm <sup>-1</sup> | IR(OD),<br>cm <sup>-1</sup> | R(OH)<br>cm <sup>-1</sup> | R(OD)<br>cm <sup>-1</sup> | IINS (OH),<br>cm <sup>-1</sup> | IINS (OD)<br>cm <sup>-1</sup> | DFT<br>[cm <sup>-1</sup> ] | Int.<br>[km/mol] | Potential energy distribution (%)                                    |
|----|-----------------------------|-----------------------------|---------------------------|---------------------------|--------------------------------|-------------------------------|----------------------------|------------------|----------------------------------------------------------------------|
| 1  |                             |                             |                           |                           | 20                             | ~14                           |                            |                  |                                                                      |
| 2  |                             |                             |                           |                           | 44                             | 42                            | 32.15                      | 0.5              | τ(C8OO) 47; τ(C7OO) 25; τ(NO <sub>2</sub> ) 19                       |
| 3  | 55,4                        | 55,4                        |                           |                           | 60                             | 62                            | 53.08                      | 0.29             | τ(NO <sub>2</sub> ) 40; τ(CCC) 25; τ(C7OO) 22                        |
| 4  | 80,0                        | 80,0                        |                           |                           | 94                             | 92,5                          | 78.67                      | 1.6              | γ(C2-C8) 31; ρ(C8OO) 26; τ(CCC) 10                                   |
| 5  | 104,1                       | 104,1                       |                           |                           | 106                            | 107                           |                            |                  |                                                                      |
| 6  | 109,9                       | 109,9                       |                           |                           | 114                            | 115                           |                            |                  |                                                                      |
| 7  | 132,6                       | 132,6                       |                           |                           |                                |                               |                            |                  |                                                                      |
| 8  | 140,3                       | 140,3                       |                           |                           | 140                            | 141                           | 144.92                     | 1.63             | τ(C8OO) 76                                                           |
| 9  |                             |                             |                           |                           |                                |                               | 164.17                     | 1.36             | γ(C1-C7 + C2-C8 – C3-N) 47; ρ(C1-C7 + C3-N + C8OO) 28                |
| 10 |                             |                             |                           |                           |                                |                               | 168.05                     | 1.74             | γ(C1-C7 + C2-C8 – C3-N) 43; ρ(C1-C7 + C3-N + C8OO) 31                |
| 11 |                             |                             |                           |                           |                                |                               | 175.37                     | 2.68             | ρ(C2-C8 + C3-N) 69; ω(C8OO) 9                                        |
| 12 | 187,6                       | 187,6 w                     |                           |                           |                                |                               | 180.51                     | 0.95             | τ(CCC) 39; γ(C1-C7 + C3-N + C4-H) 32                                 |
| 13 | 195,3                       | 193,3                       |                           |                           | 194                            | 195                           |                            |                  |                                                                      |
| 14 | 211,7 w                     | 208,8 w                     |                           |                           | 206                            | 206                           |                            |                  |                                                                      |
| 15 |                             |                             |                           |                           | 224                            | 221                           |                            |                  |                                                                      |
| 16 |                             | 221,7                       |                           | 227                       |                                |                               |                            |                  |                                                                      |
| 17 | 223,2                       |                             | 231                       |                           | 240                            | 239 w                         |                            |                  |                                                                      |
| 18 |                             |                             |                           |                           |                                |                               | 280.46                     | 1.41             | ρ(C1-C7 + C2-C8 – C3-N) 50; ρ(NO <sub>2</sub> – C7OO) 28; ω(C8OO) 10 |
| 19 |                             |                             | 294                       | 292                       | 294                            | 295                           | 289.6                      | 2.09             | δ(CCC) 37; ν <sub>asym</sub> (C2-C8 – C3-N – C1-C7) 31               |
| 20 | 311,5                       | 309,1                       | 316                       | 314                       | 314                            | 312                           |                            |                  |                                                                      |
| 21 |                             |                             | 327                       | 325                       |                                |                               | 350.37                     | 1.06             | τ(CCC) 40; γ(C1-C7 – C3-N) 23; ρ(C8OO) 15                            |





|    |          |           |         |        |      |       |         |        |                                                                                                                                  |
|----|----------|-----------|---------|--------|------|-------|---------|--------|----------------------------------------------------------------------------------------------------------------------------------|
| 50 | 818,8    |           | 817     | 812 w  | 826  | -     |         |        |                                                                                                                                  |
| 51 | 835,2    | 835,2 w   |         | 839    | 845  |       | 813.81  | 0.73   | $\delta(\text{CCC})$ 32; $\delta(\text{NO}_2)$ 23; $\nu(\text{C1-C7})$ 10                                                        |
| 52 |          |           |         |        |      | 845   | 847.65  | 2.51   | $\gamma(\text{C1-C7} - \text{C3-N} + \text{C4-H} + \text{C5-H})$ 40; $\tau(\text{CCC})$ 29                                       |
| 53 | 875,7    | -         |         |        | 875  |       |         |        |                                                                                                                                  |
| 54 |          |           |         |        |      |       |         |        | 885                                                                                                                              |
| 55 |          |           |         | 906    | 895  |       |         |        |                                                                                                                                  |
| 56 | 911,3    | 903,6     | 913     | 913sh  | 926  | 916 w | 913.57  | 27.25  | $\nu_{\text{asym}}(\text{C3-N} - \text{C1-C7} - \text{C7-O2})$ 39; $\delta(\text{NO}_2)$ 29; $\delta(\text{CCC})$ 10             |
| 57 | 948,5    | 948,5     |         |        | 960  | 966   | 969.13  | 0.5    | $\gamma(\text{C-H})$ 86; $\tau(\text{CCC})$ 7                                                                                    |
| 58 | 995,2    | 995,2     |         |        |      |       |         |        |                                                                                                                                  |
| 59 | 1010,6 w | 1010,6 w  |         |        | 1007 | 1007  | 1015.78 | 1.48   | $\gamma(\text{C-H})$ 80; $\tau(\text{CCC})$ 13                                                                                   |
| 60 |          | 1029,0 sh |         |        |      |       |         |        |                                                                                                                                  |
| 61 |          | 1032,8    |         | 1032   |      |       |         |        |                                                                                                                                  |
| 62 |          |           |         | 1051   |      |       |         |        |                                                                                                                                  |
| 63 | 1068,5   | 1071,4    | 1075    | 1076   |      |       | 1079.53 | 71.9   | $\delta(\text{CCC})$ 33; $\nu_{\text{asym}}(\text{C8-O4} - \text{C7-O2})$ 20; $\nu_{\text{sym}}(\text{C4-C5} + \text{C5-C6})$ 20 |
| 64 | 1120,6   | 1119,6    | 1127    | 1129   |      |       | 1126.33 | 195.42 | $\nu(\text{C7-O2})$ 32; $\nu_{\text{asym}}(\text{C3-N} - \text{C4-C5} - \text{C5-C6})$ 28                                        |
| 65 |          |           |         |        |      |       | 1133.3  | 118.8  | $\nu(\text{C8-O4})$ 31; $\rho(\text{C-H})$ 22; $\nu_{\text{sym}}(\text{C4-C5} + \text{C7-O2})$ 12                                |
| 66 | 1154,4   | 1153,4    | 1156    | 1154   |      |       | 1183.76 | 69.17  | $\rho(\text{C5-H})$ 28; $\nu(\text{C4-C5})$ 10; $\delta(\text{CCC})$ 9; $\delta(\text{C7-O2-H})$ 8                               |
| 67 |          |           | 1164    | 1164   |      |       | 1198.76 | 105.96 | $\delta(\text{C7-O2-H})$ 26; $\rho(\text{C4-H} - \text{C5-H})$ 25; $\nu_{\text{asym}}(\text{C1-C7} - \text{C7-O2})$ 21           |
| 68 | 1214,1   | 1214,1    | 1214    | 1214   |      |       | 1210.5  | 177.78 | $\delta(\text{C8-O4-H})$ 40; $\nu_{\text{asym}}(\text{C2-C8} - \text{C8-O4} - \text{C3-C4})$ 31                                  |
| 69 | 1249,8   | 1249,9    | 1248 sh |        |      |       | 1236.6  | 11.03  | $\rho(\text{C-H})$ 43; $\nu_{\text{asym}}(\text{C3-C4} - \text{C1-C6})$ 18; $\rho(\text{C2-C8})$ 10                              |
| 70 |          |           | 1256    | 1254   |      |       |         |        |                                                                                                                                  |
| 71 | 1302,9   | 1302,9 w  | 1303    | 1302   |      |       |         |        |                                                                                                                                  |
| 72 | 1321,2   | 1321,2 w  | 1320    |        |      |       | 1333.31 | 7      | $\nu_{\text{asym}}(\text{C1-C2} - \text{C2-C3} + \text{C3-C4} - \text{C4-C5} + \text{C5-C6} - \text{C1-C6})$ 86                  |
| 73 |          | 1344,3    |         |        |      |       | 1361.76 | 109.07 | $\delta(\text{C-O-H})$ 25; $\nu(\text{C7-O2} + \text{C8-O4})$ 16; $\nu(\text{C1-C7})$ 4                                          |
| 74 | 1356,9   | 1354,9    | 1351    | 1351   |      |       | 1364.36 | 51.51  | $\delta(\text{C-O-H})$ 28; $\nu(\text{C7-O2} + \text{C8-O4})$ 20; $\nu(\text{C1-C7})$ 12                                         |
| 75 | 1395,4   | 1398,3 w  |         |        |      |       | 1377.95 | 228.62 | $\nu_{\text{sym}}(\text{ONO})$ 62; $\delta(\text{NO}_2)$ 16; $\nu(\text{C3-N})$ 13                                               |
| 76 | 1409,0   | 1404,1 w  | 1400    | 1405 w |      |       |         |        |                                                                                                                                  |

|    |        |          |      |         |         |                                                                                                                  |                                                                                                                       |
|----|--------|----------|------|---------|---------|------------------------------------------------------------------------------------------------------------------|-----------------------------------------------------------------------------------------------------------------------|
| 77 |        | 1468     | 1468 | 1471.58 | 9.25    | $\rho(\text{C-H})$ 46; $\nu_{\text{asym}}(\text{C2-C3} + \text{C3-C4} - \text{C5-C5} - \text{C1-C6})$ 35         |                                                                                                                       |
| 78 | 1473,6 | 1471,6   |      | 1491.56 | 28.94   | $\rho(\text{C-H})$ 35; $\nu_{\text{asym}}(\text{C1-C2} + \text{C2-C3} - \text{C3-C4})$ 29; $\nu(\text{C1-C7})$ 6 |                                                                                                                       |
| 79 | 1540,1 | 1540,1   | 1542 | 1542    |         |                                                                                                                  |                                                                                                                       |
| 80 | 1570,0 | 1570,0   | 1571 | 1571    | 1596.99 | 174.93                                                                                                           | $\nu_{\text{asym}}(\text{ONO})$ 65; $\nu(\text{C5-C6})$ 10                                                            |
| 81 | 1612,4 | 1612,4   | 1616 | 1615    | 1608.15 | 82.23                                                                                                            | $\nu_{\text{sym}}(\text{C1-C2} + \text{C4-C5})$ 43; $\rho(\text{C-H})$ 13                                             |
| 82 | 1665,5 | 1656,8 w |      |         |         |                                                                                                                  |                                                                                                                       |
| 83 | 1682,8 | 1675,1   | 1687 | 1676    | 1649.83 | 47.82                                                                                                            | $\nu_{\text{asym}}(\text{C2-C3} - \text{C3-C4} + \text{C5-C6} - \text{C1-C6})$ 52; $\nu_{\text{asym}}(\text{ONO})$ 16 |
| 84 | 1719,5 | 1719,5   |      |         | 1803.36 | 270.39                                                                                                           | $\nu(\text{C7=O1})$ 79                                                                                                |
| 85 | 1739,9 | 1739,9   |      |         | 1818.91 | 387.01                                                                                                           | $\nu(\text{C8=O3})$ 84                                                                                                |
| 86 |        | 2300     |      | 2341    |         |                                                                                                                  | $\nu(\text{O-D})$                                                                                                     |
| 87 |        |          |      | 2610    |         |                                                                                                                  | $\nu(\text{O-D})$                                                                                                     |
| 88 |        | 2617     |      |         | 3753.14 | 109.04                                                                                                           | $\nu(\text{O4-H})$ 100                                                                                                |
| 89 | 2950   | 2700     |      |         | 3767.78 | 125.98                                                                                                           | $\nu(\text{O2-H})$ 100                                                                                                |
| 90 |        | 3084     | 3084 |         |         |                                                                                                                  |                                                                                                                       |
| 91 |        | 3095     | 3094 |         | 3193.53 | 3.43                                                                                                             | $\nu_{\text{asym}}(\text{C-H})$ 95                                                                                    |
| 92 | 3114   | 3118     | 3119 |         | 3219.99 | 3.74                                                                                                             | $\nu_{\text{asym}}(\text{C-H})$ 99                                                                                    |
| 93 |        | 3150,6   | 3144 | 3145    | 3222.77 | 0.96                                                                                                             | $\nu_{\text{sym}}(\text{C-H})$ 100                                                                                    |

4

5

6

$\nu$  - stretching vibration;  $\delta$  - scissoring vibration;  $\rho$  - rocking;  $\omega$  - wagging;  $\gamma$  - out-of-plane;  $\tau$  - twisting and torsional vibration; sh - shoulder and w - weak (small intensity).

7 **Table S5.** Experimental IR, Raman, IINS and calculated DFT (B3LYP/6-311+G(d,p)) spectral data of compound **4** and its mono deuterated (OH → OD) derivative.  
8

| No | IR(OH),<br>cm <sup>-1</sup> | IR(OD),<br>cm <sup>-1</sup> | R(OH)<br>cm <sup>-1</sup> | R(OD)<br>cm <sup>-1</sup> | IINS(OH),<br>cm <sup>-1</sup> | IINS(OD),<br>cm <sup>-1</sup> | x DFT,<br>cm <sup>-1</sup> | Intensity<br>[km/mol] | Potential energy distribution, %                                                         |
|----|-----------------------------|-----------------------------|---------------------------|---------------------------|-------------------------------|-------------------------------|----------------------------|-----------------------|------------------------------------------------------------------------------------------|
| 1  |                             |                             |                           |                           | 21                            |                               | 23.37                      | 0.5                   | τ(C7OO – C8OO) 91                                                                        |
| 2  |                             |                             |                           |                           | 41                            |                               | 39.54                      | 0.09                  | τ(NO <sub>2</sub> ) 77; τ(CCC) 10; τ(C8OO) 8                                             |
| 3  |                             |                             |                           |                           | 53                            |                               | 69.69                      | 3.03                  | τ(CCC) 41; γ(1-C7) 17; τ(C7OO + C8OO) 14                                                 |
| 4  |                             |                             |                           |                           | 86                            |                               |                            |                       |                                                                                          |
| 5  |                             | 122                         |                           |                           | 106                           |                               | 97.72                      | 1.3                   | τ(C7OO + C8OO) 50; ρ(C1-C7 + C2-C8) 29                                                   |
| 6  | 142,7                       |                             |                           |                           | 148                           | 131                           | 141.71                     | 1.05                  | γ(C2-C8 + C4-N) 43; ρ(C2-C8) 8                                                           |
| 7  |                             | 150,9                       |                           | 160 w                     | 162                           | 162                           | 149.67                     | 2.9                   | ρ(C4-N + C1-C7 – C2-C8) 63; γ(C2-C8) 8                                                   |
| 8  | 179,8                       |                             |                           | 173                       | 182                           | 180                           | 164.8                      | 1.76                  | ρ(C1-C7 + C2-C8) 65; ω(C7OO) 10                                                          |
| 9  |                             | 196                         |                           | 196                       | 196                           |                               | 209.09                     | 5.92                  | γ(C1-C7) 37; ρ(C7OO) 18; γ(C4-N) 17                                                      |
| 10 |                             |                             | 236                       |                           |                               | 208                           |                            |                       |                                                                                          |
| 11 |                             | 244,4                       | 244 sh                    | 243                       | 248                           | 251                           |                            |                       |                                                                                          |
| 12 | 263,7                       | 263,7                       |                           | 261 w                     | 270                           | 273                           |                            |                       |                                                                                          |
| 13 | 285,4                       |                             |                           |                           | 289                           |                               | 280.5                      | 1.12                  | δ(CCC) 30; ν <sub>sym</sub> (C1-C7 + C4-N) 21; ρ(C4-N) 12; ρ(C7OO – NO <sub>2</sub> ) 12 |
| 14 | 306,2                       |                             | 296                       | 302                       | 300                           |                               | 296.09                     | 0.44                  | ρ(C2-C8 – C1-C7 + C4-N) 36; ρ(C8OO + NO <sub>2</sub> ) 26                                |
| 15 | 307,1                       |                             |                           |                           | 309                           | 306                           |                            |                       |                                                                                          |
| 16 |                             | 316,8                       |                           | 315                       |                               | 325                           |                            |                       |                                                                                          |
| 17 |                             |                             | 326                       |                           | 331                           |                               |                            |                       |                                                                                          |
| 18 | 357,3                       | 357,3                       | 366                       | 355                       | 364                           | 361                           | 351.38                     | 2.4                   | ν <sub>sym</sub> (C2-C8 + C4-N) 33; δ(CCC) 22; δ(C8OO) 13                                |
| 19 |                             | 378,0                       | 386                       | 375 sh                    | 388                           | 382                           | 379.44                     | 0.17                  | τ(CCC) 35; γ(C2-C8 – C4-N) 26; ρ(C7OO + C8OO) 20                                         |
| 20 | 403,0                       | 401,1                       |                           |                           | 408                           | 408                           |                            |                       |                                                                                          |
| 21 |                             |                             |                           |                           | 434                           |                               |                            |                       |                                                                                          |
| 22 | 432,0                       | 439,7                       |                           |                           | 438                           |                               | 415.24                     | 7.51                  | τ(CCC) 57; γ(C2-C8) 14                                                                   |
| 23 |                             |                             | 446                       |                           |                               | 446                           |                            |                       |                                                                                          |

|    |          |          |       |       |     |       |        |       |                                                                                                                                                 |
|----|----------|----------|-------|-------|-----|-------|--------|-------|-------------------------------------------------------------------------------------------------------------------------------------------------|
| 24 | 458,5    |          | 459 w |       | 463 |       | 456.68 | 2.63  | $\tau(\text{CCC})$ 23; $\gamma(\text{C2-C8})$ 15                                                                                                |
| 25 |          | 469,6    |       |       |     | 478   |        |       |                                                                                                                                                 |
| 26 |          |          |       |       |     |       |        |       |                                                                                                                                                 |
| 27 | 522,6    | 524,1    | 524   | 520   | 528 | 523   | 519.7  | 15.03 | $\rho(\text{NO}_2 + \text{C7OO})$ 53; $\rho(\text{C4-N})$ 10                                                                                    |
| 28 |          | 560,2    | 566   | 558   |     |       | 539.83 | 15.98 | $\tau(\text{CCC})$ 46; $\gamma(\text{C4-N})$ 17                                                                                                 |
| 29 | 575,7 sh |          |       |       | 569 | 563   | 567.4  | 36.04 | $\tau(\text{C-O-H})$ 33; $\tau(\text{CCC})$ 33                                                                                                  |
| 30 | 589,2    | 586,3    | 592   |       | 599 | 597   | 594.11 | 92.97 | $\tau(\text{C-O-H})$ 74                                                                                                                         |
| 31 |          | 628,0 w  |       |       |     |       | 604.97 | 75.3  | $\tau(\text{C-O-H})$ 23; $\rho(\text{C2-C8} + \text{C4-N})$ 16; $\delta(\text{CCC})$ 11                                                         |
| 32 |          | 638,8 w  |       |       |     |       |        |       |                                                                                                                                                 |
| 33 |          | 653,8 w  |       |       |     |       |        |       |                                                                                                                                                 |
| 34 | 655      |          | 655   | 655   | 659 |       | 651.86 | 34.58 | $\delta(\text{C8OO})$ 42; $\delta(\text{CCC})$ 29                                                                                               |
| 35 |          |          |       |       |     |       |        |       |                                                                                                                                                 |
| 36 | 694,0    | 690 sh   | 689   | 684 w |     |       | 669.95 | 15.67 | $\delta_{\text{asym}}(\text{C7OO} - \text{C8OO})$ 34; $\delta(\text{CCC})$ 25                                                                   |
| 37 | 701,0    | 703,0    | 714 w |       | 704 | 704 w | 702.64 | 13.34 | $\tau(\text{CCC})$ 47; $\gamma(\text{C1-C7})$ 13                                                                                                |
| 38 | 740,6    | 740,6    | 744   | 743   |     |       | 727.02 | 27.5  | $\omega(\text{NO}_2)$ 53; $\tau(\text{CCC})$ 18; $\gamma(\text{C4-N})$ 16                                                                       |
| 39 |          | 749,3 sh |       |       |     |       |        |       |                                                                                                                                                 |
| 40 | 763,8    |          | 767   |       | 766 | 754   | 752.13 | 28.64 | $\nu_{\text{sym}}(\text{C1-C2} + \text{C1-C7} + \text{C2-C8})$ 26; $\delta_{\text{sym}}(\text{C7OO} + \text{C8OO})$ 17; $\delta(\text{CCC})$ 14 |
| 41 |          | 783,1    | 780   |       |     |       | 783.16 | 53.08 | $\omega(\text{C7OO} + \text{C8OO})$ 56; $\rho(\text{C1-C7})$ 9                                                                                  |
| 42 | 790,0    | 798,5    | 792   | 799   | 800 |       | 806.74 | 21.65 | $\gamma(\text{C1-C7} + \text{C2-C8})$ 30; $\omega(\text{C8OO})$ 28                                                                              |
| 43 | 812,0    | 810,0    | 809   | 810 w |     | 809   | 815.98 | 31.75 | $\delta(\text{NO}_2)$ 40; $\delta(\text{CCC})$ 19                                                                                               |
| 44 | 835,0    |          |       | 827 w |     |       |        |       |                                                                                                                                                 |
| 45 |          | 857,3    |       |       |     |       |        |       |                                                                                                                                                 |
| 46 | 862,2    |          | 861   |       | 870 |       | 873.23 | 27.74 | $\gamma(\text{C-H})$ 70; $\tau(\text{CCC})$ 9                                                                                                   |
| 47 |          | 870,2    |       |       |     | 880   |        |       |                                                                                                                                                 |
| 48 | 896,9    |          |       |       |     |       |        |       |                                                                                                                                                 |
| 49 | 910,4 w  | 913,3    | 913   | 911   |     |       |        |       |                                                                                                                                                 |
| 50 | 931,6    | 924,8 sh | 928   |       | 938 | 921   | 920.13 | 26.21 | $\nu_{\text{asym}}(\text{C4-N} - \text{C2-C8})$ 32; $\delta(\text{NO}_2)$ 23; $\delta(\text{CCC})$ 12                                           |

|    |         |           |       |         |      |        |         |                                                |                                                                                                                                           |
|----|---------|-----------|-------|---------|------|--------|---------|------------------------------------------------|-------------------------------------------------------------------------------------------------------------------------------------------|
| 51 |         |           |       |         |      | 953.03 | 12.2    | $\gamma(\text{C-H})$ 73; $\tau(\text{CCC})$ 13 |                                                                                                                                           |
| 52 | 980,8 w | 975 w     | 977 w |         | 989  | 1001   | 999.47  | 0.35                                           | $\gamma(\text{C-H})$ 84; $\tau(\text{CCC})$ 12                                                                                            |
| 53 |         | 995,2     |       | 994     |      |        |         |                                                |                                                                                                                                           |
| 54 |         | 1013,6    |       | 1009 w  |      |        |         |                                                |                                                                                                                                           |
| 55 | 1062,7  | 1065,0    | 1062  | 1064 w  | 1078 | 1084   | 1067.19 | 83.35                                          | $\delta(\text{CCC})$ 35; $\nu_{\text{asym}}(\text{C8-O4} - \text{C7-O2})$ 23; $\nu_{\text{sym}}(\text{C3-C4} + \text{C4-C5})$ 18          |
| 56 | 1120,6  | 1120,6 w  | 1120  | 1123    |      |        | 1118.49 | 145.27                                         | $\nu(\text{C7-O2})$ 40; $\nu_{\text{sym}}(\text{C1-C2} + \text{C1-C6})$ 13; $\nu(\text{C8-O4})$ 7                                         |
| 57 |         |           |       |         |      |        | 1126.71 | 107.93                                         | $\nu_{\text{sym}}(\text{C3-C4} + \text{C4-C5} + \text{C5-C6})$ 24; $\nu(\text{C4-N})$ 19; $\nu(\text{C8-O4})$ 18; $\delta(\text{CCC})$ 11 |
| 58 |         | 1140,8    | 1153  |         |      |        |         |                                                |                                                                                                                                           |
| 59 | 1146,0  | 1150,5    | 1157  | 1158    | 1156 | 1155   | 1157.31 | 19.53                                          | $\rho(\text{C-H})$ 51; $\nu(\text{C5-C6})$ 16; $\nu(\text{C8-O4})$ 10                                                                     |
|    |         |           |       |         |      |        | 1197.4  | 173.44                                         | $\delta(\text{C-O-H})$ 39; $\nu_{\text{asym}}(\text{C1-C7} - \text{C2-C8})$ 16; $\delta(\text{CCC})$ 15                                   |
| 60 | 1236,3  | 1231,5    | 1249  | 1353 sh |      |        | 1211.25 | 192.16                                         | $\delta(\text{C-O-H})$ 44; $\nu_{\text{asym}}(\text{C1-C7} - \text{C2-C3} + \text{C2-C8})$ 23                                             |
| 61 | 1269,1  | 1299,0 br | 1270  |         |      | 1275   | 1285.18 | 4.81                                           | $\rho(\text{C-H})$ 64; $\nu(\text{C1-C6})$ 12                                                                                             |
| 62 | 1309,6  | 1312,5    |       |         |      |        |         |                                                |                                                                                                                                           |
| 63 |         |           |       |         |      |        | 1342.61 | 0.96                                           | $\nu_{\text{asym}}(\text{C1-C2} - \text{C1-C6} - \text{C2-C3} + \text{C3-C4} - \text{C4-C5} + \text{C5-C6})$ 82                           |
|    |         |           |       |         |      |        | 1360.3  | 104.64                                         | $\delta(\text{C-O-H})$ 24; $\nu(\text{C7-O2})$ 14; $\nu(\text{C1-C7})$ 11                                                                 |
| 64 | 1351,0  | 1353,0    | 1353  | 1358    |      |        | 1365.7  | 300.9                                          | $\nu_{\text{sym}}(\text{ONO})$ 23; $\delta(\text{C-O-H})$ 9; $\nu(\text{C8-O4})$ 8                                                        |
| 65 | 1388.0  |           |       |         |      |        | 1377.0  | 127.14                                         | $\nu_{\text{sym}}(\text{ONO})$ 42; $\nu(\text{C4-N})$ 12; $\delta(\text{NO}_2)$ 11                                                        |
| 66 | 1419,6  |           |       | 1406    |      |        |         |                                                |                                                                                                                                           |
| 67 | 1430,2  | 1425,3    | 1425  |         |      |        |         |                                                |                                                                                                                                           |
| 68 | 1439,0  |           | 1454  |         |      |        | 1432.9  | 10.95                                          | $\nu_{\text{asym}}(\text{C1-C6} - \text{C2-C3} - \text{C3-C4} + \text{C5-C6})$ 44; $\rho(\text{C-H})$ 18; $\nu(\text{C2-C8})$ 7           |
| 69 |         |           | 1488  |         |      |        |         |                                                |                                                                                                                                           |
| 70 | 1496,7  | 1491,9    | 1495  | 1491    |      |        | 1512.91 | 16.95                                          | $\rho(\text{C-H})$ 45; $\nu_{\text{asym}}(\text{C1-C2} + \text{C1-C6} - \text{C3-C4} - \text{C4-C5})$ 34; $\nu(\text{C1-C7})$ 5           |
| 71 | 1536,0  | 1532,4    | 1522  |         |      |        |         |                                                |                                                                                                                                           |
| 72 |         |           | 1543  | 1539    |      |        |         |                                                |                                                                                                                                           |
| 73 | 1599,9  | 1590,3    | 1593  | 1591    |      |        | 1584.07 | 146.88                                         | $\nu_{\text{asym}}(\text{ONO})$ 66; $\nu_{\text{sym}}(\text{C1-C2} + \text{C4-C5})$ 14                                                    |
| 74 | 1610,5  | 1610,5    | 1611  | 1614    |      |        | 1626.04 | 37.22                                          | $\nu_{\text{asym}}(\text{C1-C2} - \text{C2-C3} + \text{C4-C5} - \text{C5-C6})$ 57                                                         |
| 75 |         |           | 1630  |         |      |        | 1649.2  | 92.87                                          | $\nu_{\text{asym}}(\text{C1-C6} + \text{C3-C4} - \text{C4-C5})$ 42; $\nu_{\text{asym}}(\text{ONO})$ 16                                    |

|    |        |           |         |         |        |             |
|----|--------|-----------|---------|---------|--------|-------------|
| 76 |        |           | 1649    |         |        |             |
| 76 | 1683,0 |           | 1690    |         |        |             |
| 77 |        | 1715,6 br | 1713    |         |        |             |
| 78 |        |           | 1724    |         |        |             |
| 78 | 1732,0 |           | 1732    | 1799.68 | 324.15 | v(C8=O3) 77 |
| 79 |        |           | 1737 sh | 1811.11 | 376.15 | v(C7=O1) 81 |
| 80 | 1952   |           |         |         |        |             |
| 81 |        | 2066      | 2054    |         |        |             |
| 82 |        | 2548      | 2249    |         |        |             |
| 83 |        | 2637      | 2618    |         |        |             |
| 84 | 2590   |           | 2620    | 3750.15 | 106.89 | v(O2-H) 100 |
| 85 | 2725   |           | 2698    | 3765.65 | 123.32 | v(O4-H) 100 |
| 86 | 2867   |           | 2864    |         |        |             |
| 87 |        |           | 2974    |         |        |             |
| 88 |        |           | 2958    |         |        |             |
| 89 | 3091,0 | 3112      | 3087    | 3197.99 | 0.68   | v(C6-H) 94  |
| 90 |        |           | 3099    | 3224.56 | 4.68   | v(C5-H) 94  |
| 91 |        |           | 3112    | 3238.32 | 12.44  | v(C3-H) 99  |

9

10

11

v - stretching vibration;  $\delta$  - scissoring vibration;  $\rho$  - rocking;  $\omega$  - wagging;  $\gamma$  - out-of-plane;  $\tau$  - twisting and torsional vibration; sh - shoulder and w - weak (small intensity).
